# Supplementary material
Source: Springer Nature journal article supplement (https://www.springermedizin.de/resource/supplementary/13002_2010_210_MOESM1_ESM.pdf/9627410)
Supplement: MOESM1 [file 9627410]

# Riozinho do Anfrísio Extractive Reserve

Brazil

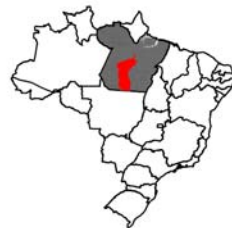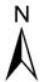

## Legend

-  High Riozinho do Anfrísio
-  Medium Riozinho do Anfrísio
-  Low Riozinho do Anfrísio

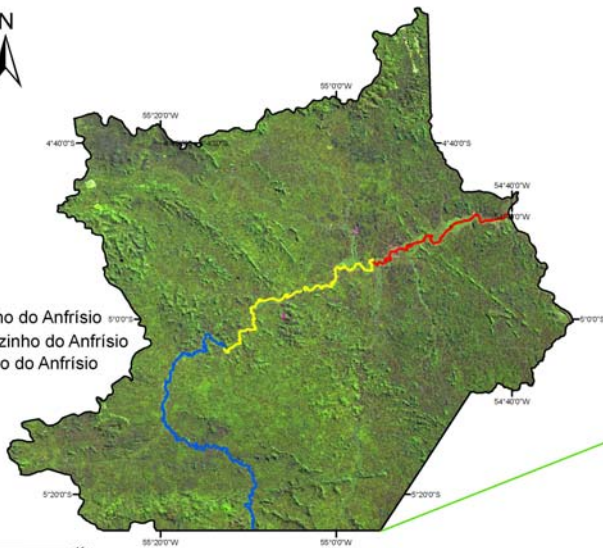

State of Pará

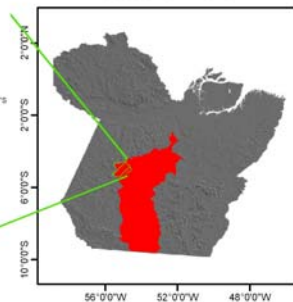

300 150 0 300 600 900 Km
